# Supplementary material
Source: publisher site journal article supplement (https://www.dovepress.com/article/218641)
Supplement: Supplementary file 1 [file get_supplementary_file.php]

## Appendix 1

### Criteria for dementia cases identification

Patients who meet one of the following criteria are selected:

- From Hospital Discharge Registry (HDR), inclusive of passive mobility, the discharge (ordinary or DH regimen), in the year of estimate or in the four previous years with main or secondary diagnosis of the conditions listed below (ICD-IX-CM): 290, 291.2, 292.82, 294.1, 046.1, 331.0, 331.1, 331.2, 331.82, 331.89, 331.9;
- from Drug Claims Registry (PHARM) reversible acetylcholinesterase inhibitor drugs and N-Methyl-D-Aspartate receptor antagonist prescriptions (ATC codes: N06D) in the year of estimate or in the previous four years;
- from Ticket Exemption Registry (TER) an exemption code for dementia or Alzheimer's disease (codes: 011 and 029 respectively) activated prior to the year of estimate are selected

## Appendix 2

### ATC codes for antipsychotic drug exposure

- Typical antipsychotics:

|         |                                                                  |
|---------|------------------------------------------------------------------|
| N05AA   | Phenothiazines (chlorpromazine, levomepromazine, promazine)      |
| N05AD   | Butyrophenone derivatives (haloperidol, bromperidol, droperidol) |
| N05AL   | Benzamides (amisulpride, levosulpiride, Sulpiride, Tiapride)     |
| N05AF   | Thioxanthene derivatives ( Zuclopentixolo)                       |
| N05AG   | Diphenylbutylpiperidine derivatives (pimozide)                   |
| N05AH06 | Clotiapine                                                       |

- Atypical antipsychotics:

|         |             |
|---------|-------------|
| N05AH02 | Clozapine   |
| N05AH03 | Olanzapine  |
| N05AX08 | Risperidone |
| N05AH04 | Quetiapine  |
| N05AX12 | Aripipazole |
| N05AE04 | Ziprasidone |
| N05AL05 | Amisulpride |

### Appendix 3

#### ICD-9-CM codes for cardiovascular risk factors and comorbidities , registered in the 24 months preceding the enrolment date

| Cardiovascular risk factor                                 | ICD-9-CM codes                                                                    |
|------------------------------------------------------------|-----------------------------------------------------------------------------------|
| <b>Disorders of lipid metabolism</b>                       | 272                                                                               |
| <b>Hypertension</b>                                        | 401-405                                                                           |
| <b>Ischemic heart disease<sup>^</sup></b>                  | 410-414, 429.7, V45.81, 36.1, V45.82, 00.66, 36.0                                 |
| <b>Heart failure</b>                                       | 428                                                                               |
| <b>Cerebrovascular diseases'</b>                           | 430-434, 436-438, 435, 00.61, 00.62, 38.01, 38.02, 38.11, 38.12,38.31, 38.32      |
| Comorbidity                                                | ICD-9-CM codes                                                                    |
| Malignant neoplasm                                         | 140.0-208.9, V10                                                                  |
| Diabetes                                                   | 250                                                                               |
| <b>COPD</b>                                                | 491-492, 494,496,518.82,518.83,518.84                                             |
| <b>Fluid, electrolytes and base-acid balance disorders</b> | 276                                                                               |
| Chronic kidney diseases                                    | 584-586                                                                           |
| Kidney and urinary tract infections                        | 590, 595,597                                                                      |
| Pneumonia                                                  | 480-486                                                                           |
| Gastric, duodenal, peptic, gastrojejunal ulcer             | 531-534                                                                           |
| Disease of the blood and blood-forming organs              | 280-289                                                                           |
| Chronic liver, chronic pancreas and intestine diseases     | 571-572,577.1-577.9                                                               |
| Fracture of neck of femur                                  | 820.0-820.9                                                                       |
| Schizophrenia                                              | 295                                                                               |
| Bipolar disorder                                           | 296.00-296.06, 296.40-296.46, 296.50-296.56, 296.60-296.66, 296.80, 296.89, 296.7 |
| Depression                                                 | 296.20-296.26, 296.30-296.36                                                      |

## Appendix 4

### ATC codes for drugs other than antipsychotics

|                     |      |
|---------------------|------|
| Antidepressants     | N06A |
| Anti-dementia drugs | N06D |
